# Supplementary material
Source: publisher site journal article supplement (https://www.dovepress.com/article/416329)
Supplement: Supplementary file 1 [file get_supplementary_file.php]

***Supplementary Data***

**Supplementary Tables**

Table S1. Characteristics of CAD patients and normal persons.

| Variables | Health （n=10） | CAD（n=12） | P-value |
| --- | --- | --- | --- |
| Age（year，） | 57±14.77 | 68±10.84 | 0.107 |
| Male（%） | 40% | 75% | 0.19 |
| systolic pressure（mmHg， ） | 128.2±26.97 | 143.92±20.69 | 0.159 |
| diastolic pressure（mmHg， ） | 81.4±13.46 | 81.42±10.54 | 0.872 |
| BMI（） | 21.8±1.08 | 24.57±2.15 | 0.002 |
| Current smoker（%） | 30% | 33.3% | 1 |
| Drinking history（%） | 10% | 25% | 0.59 |
| Antihypertensive drugs（%） | 100% | 60% | 0.029 |
| Oral antidiabetic drugs（%） | 58.3% | 10% | 0.03 |
| Statin（%） | 20% | 75% | 0.03 |
| Blood biochemical indicators（） | | | |
| TC（mmol/L，） | 4.64±1.07 | 3.28±0.98 | 0.011 |
| TG（mmol/L） | 1.5±0.73 | 1.91±0.71 | 0.18 |
| HDL（mmol/L） | 1.13±0.3 | 1.05±0.39 | 0.456 |
| LDL（mmol/L） | 2.98±0.88 | 1.68±0.66 | 0.002 |
| BUN（mmol/L） | 6.28±1.49 | 6.81±1.91 | 0.456 |
| Cr（umol/L） | 73.7±15.94 | 81.5±31.22 | 0.771 |
| cTNI（pg/ml） | 8.1±7.6 | 10.1±10.32 | 0.821 |

The measurement data were first tested for normality by the S-W method, and found that some variables did not obey the Normal distribution. Finally, the mann whitney U test, a nonparametric test, was used to calculate the p value, and the descriptive statistics were represented by the mean plus or minus the standard deviation; Counting data are calculated by Chi-squared test of R×C bi-directional unordered variables, and descriptive statistics are expressed in percentage

**Supplementary Figures**


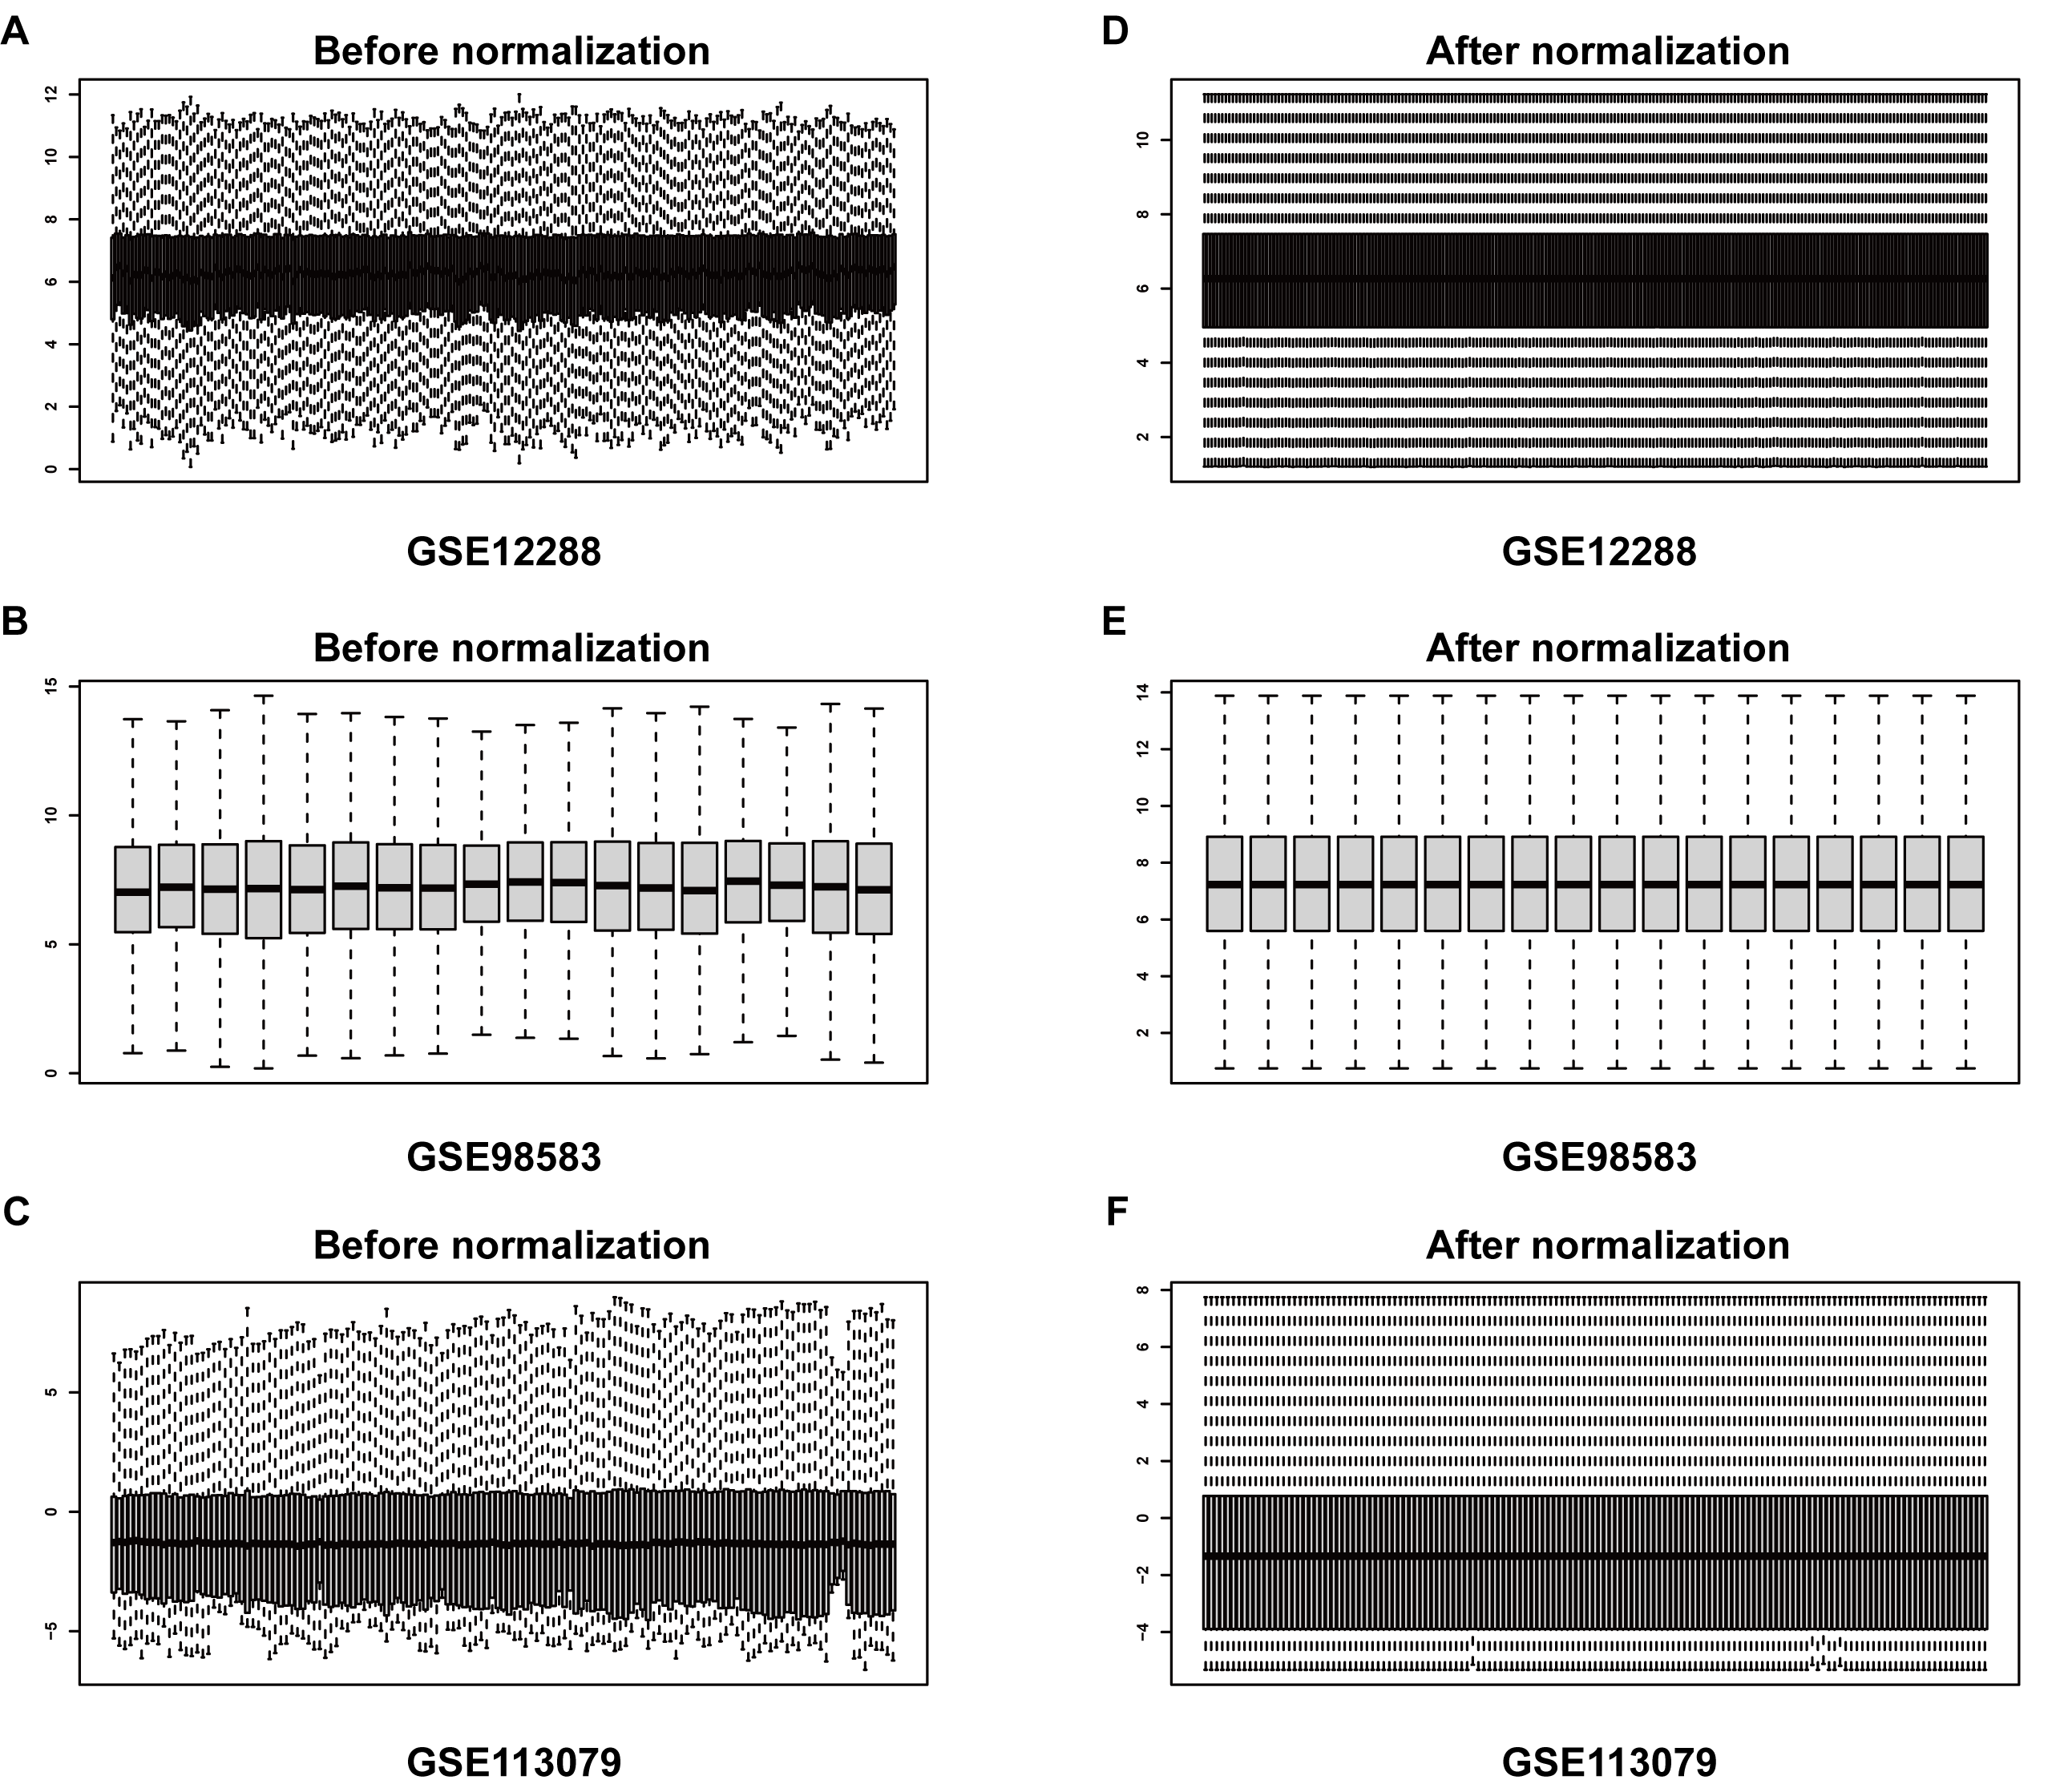


**Figure S1** Standardization of data sets. Case diagrams before (A, B, C) and after (D, E, F) normalization.


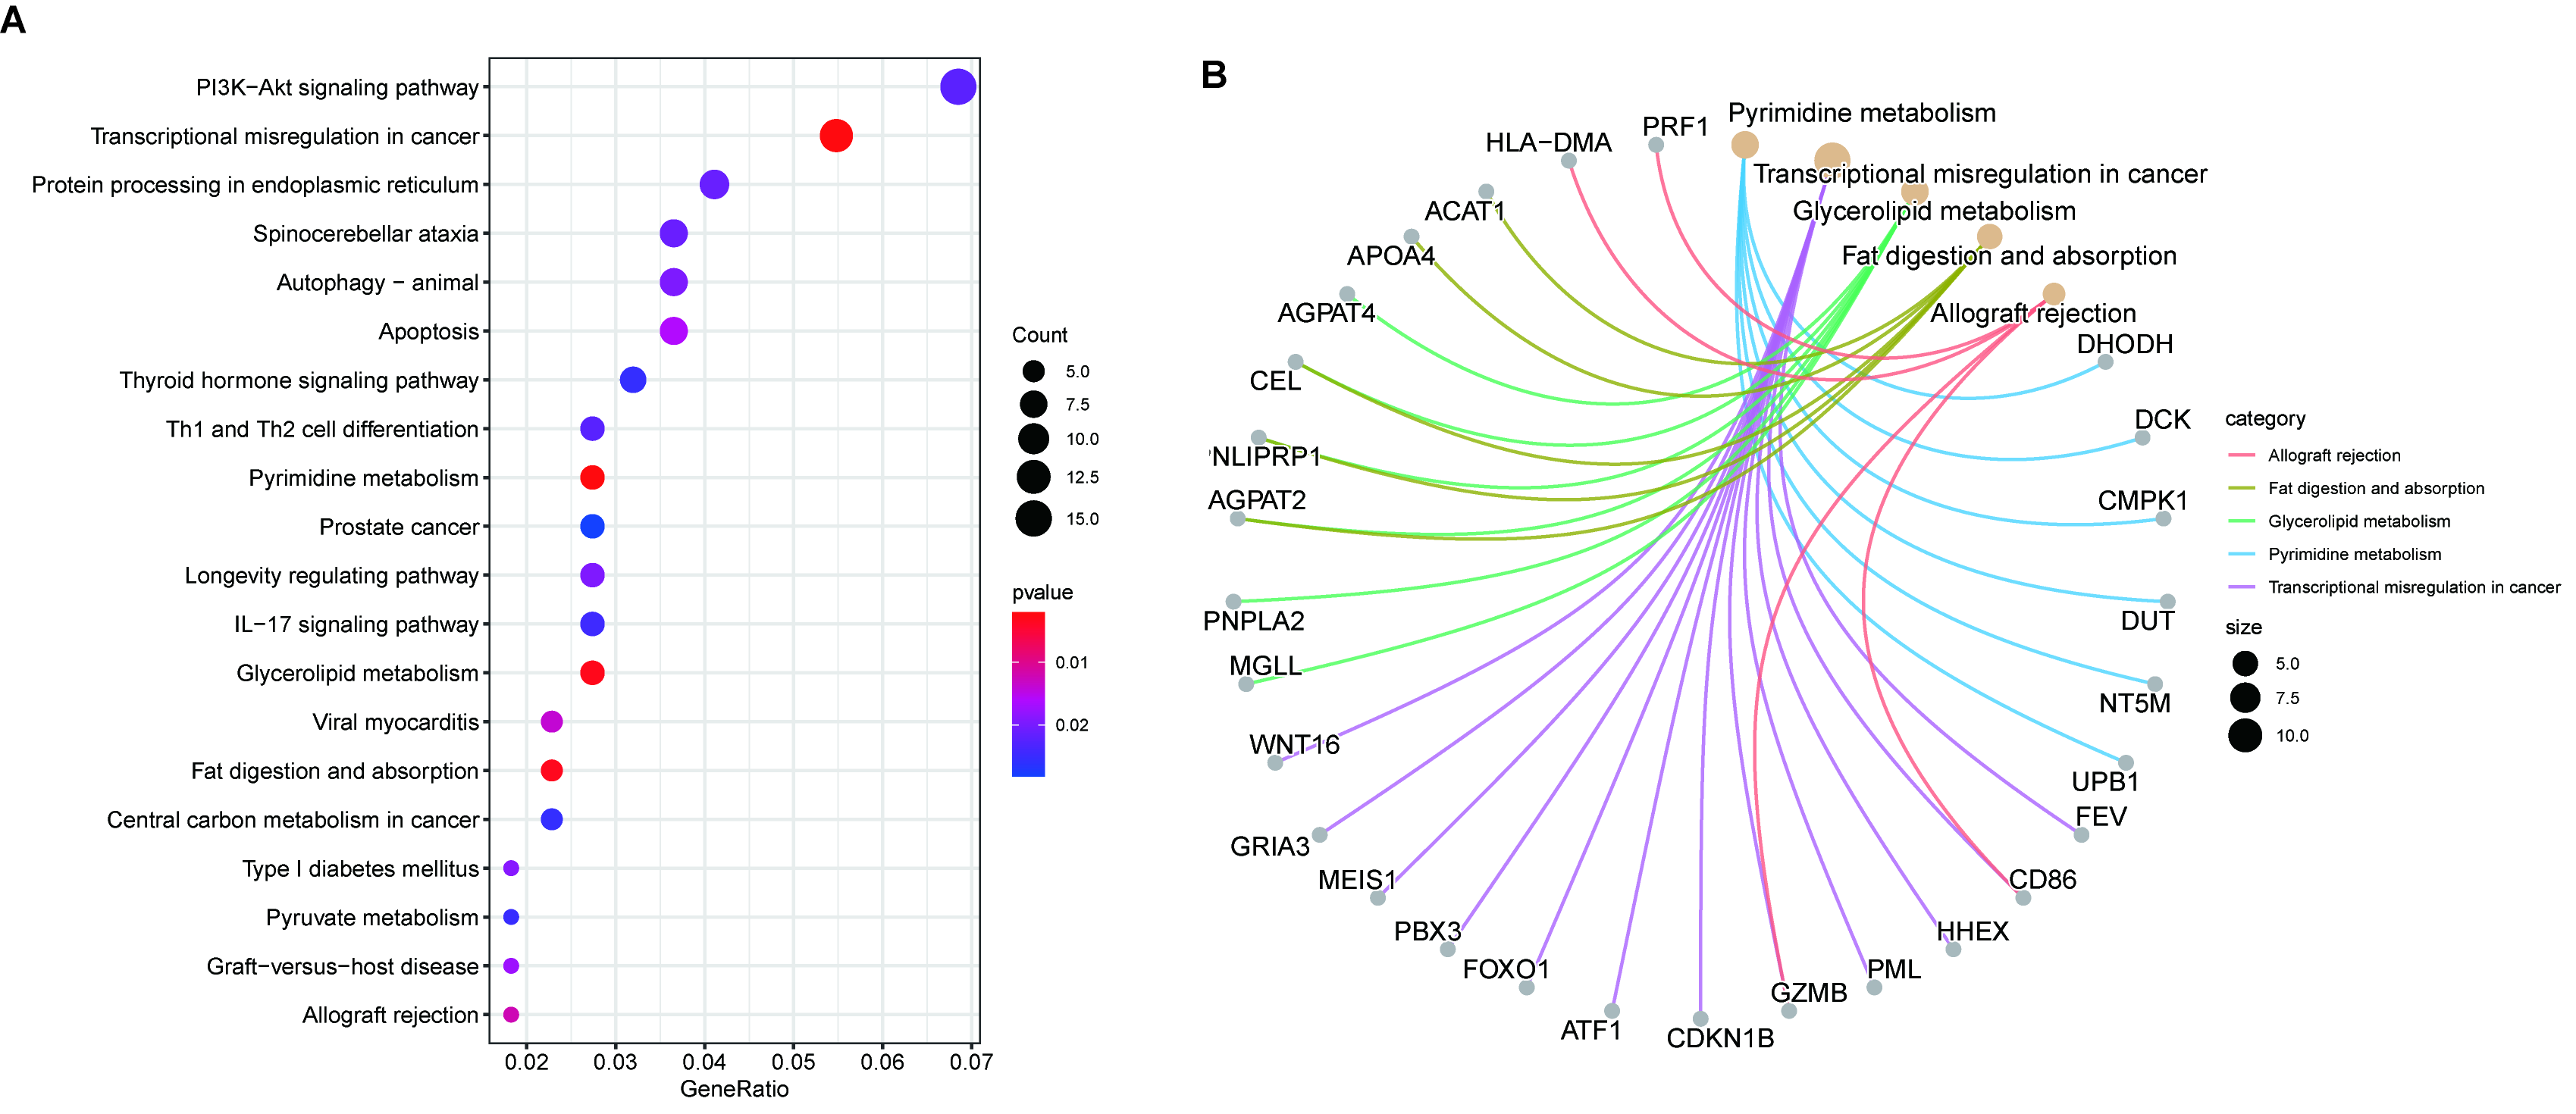


**Figure S2** KEGG enrichment analysis of module genes. (A) KEGG pathway enrichment analysis results (top20 results). (B) Corresponding relationships between keggtop5 result genes and pathways.

**
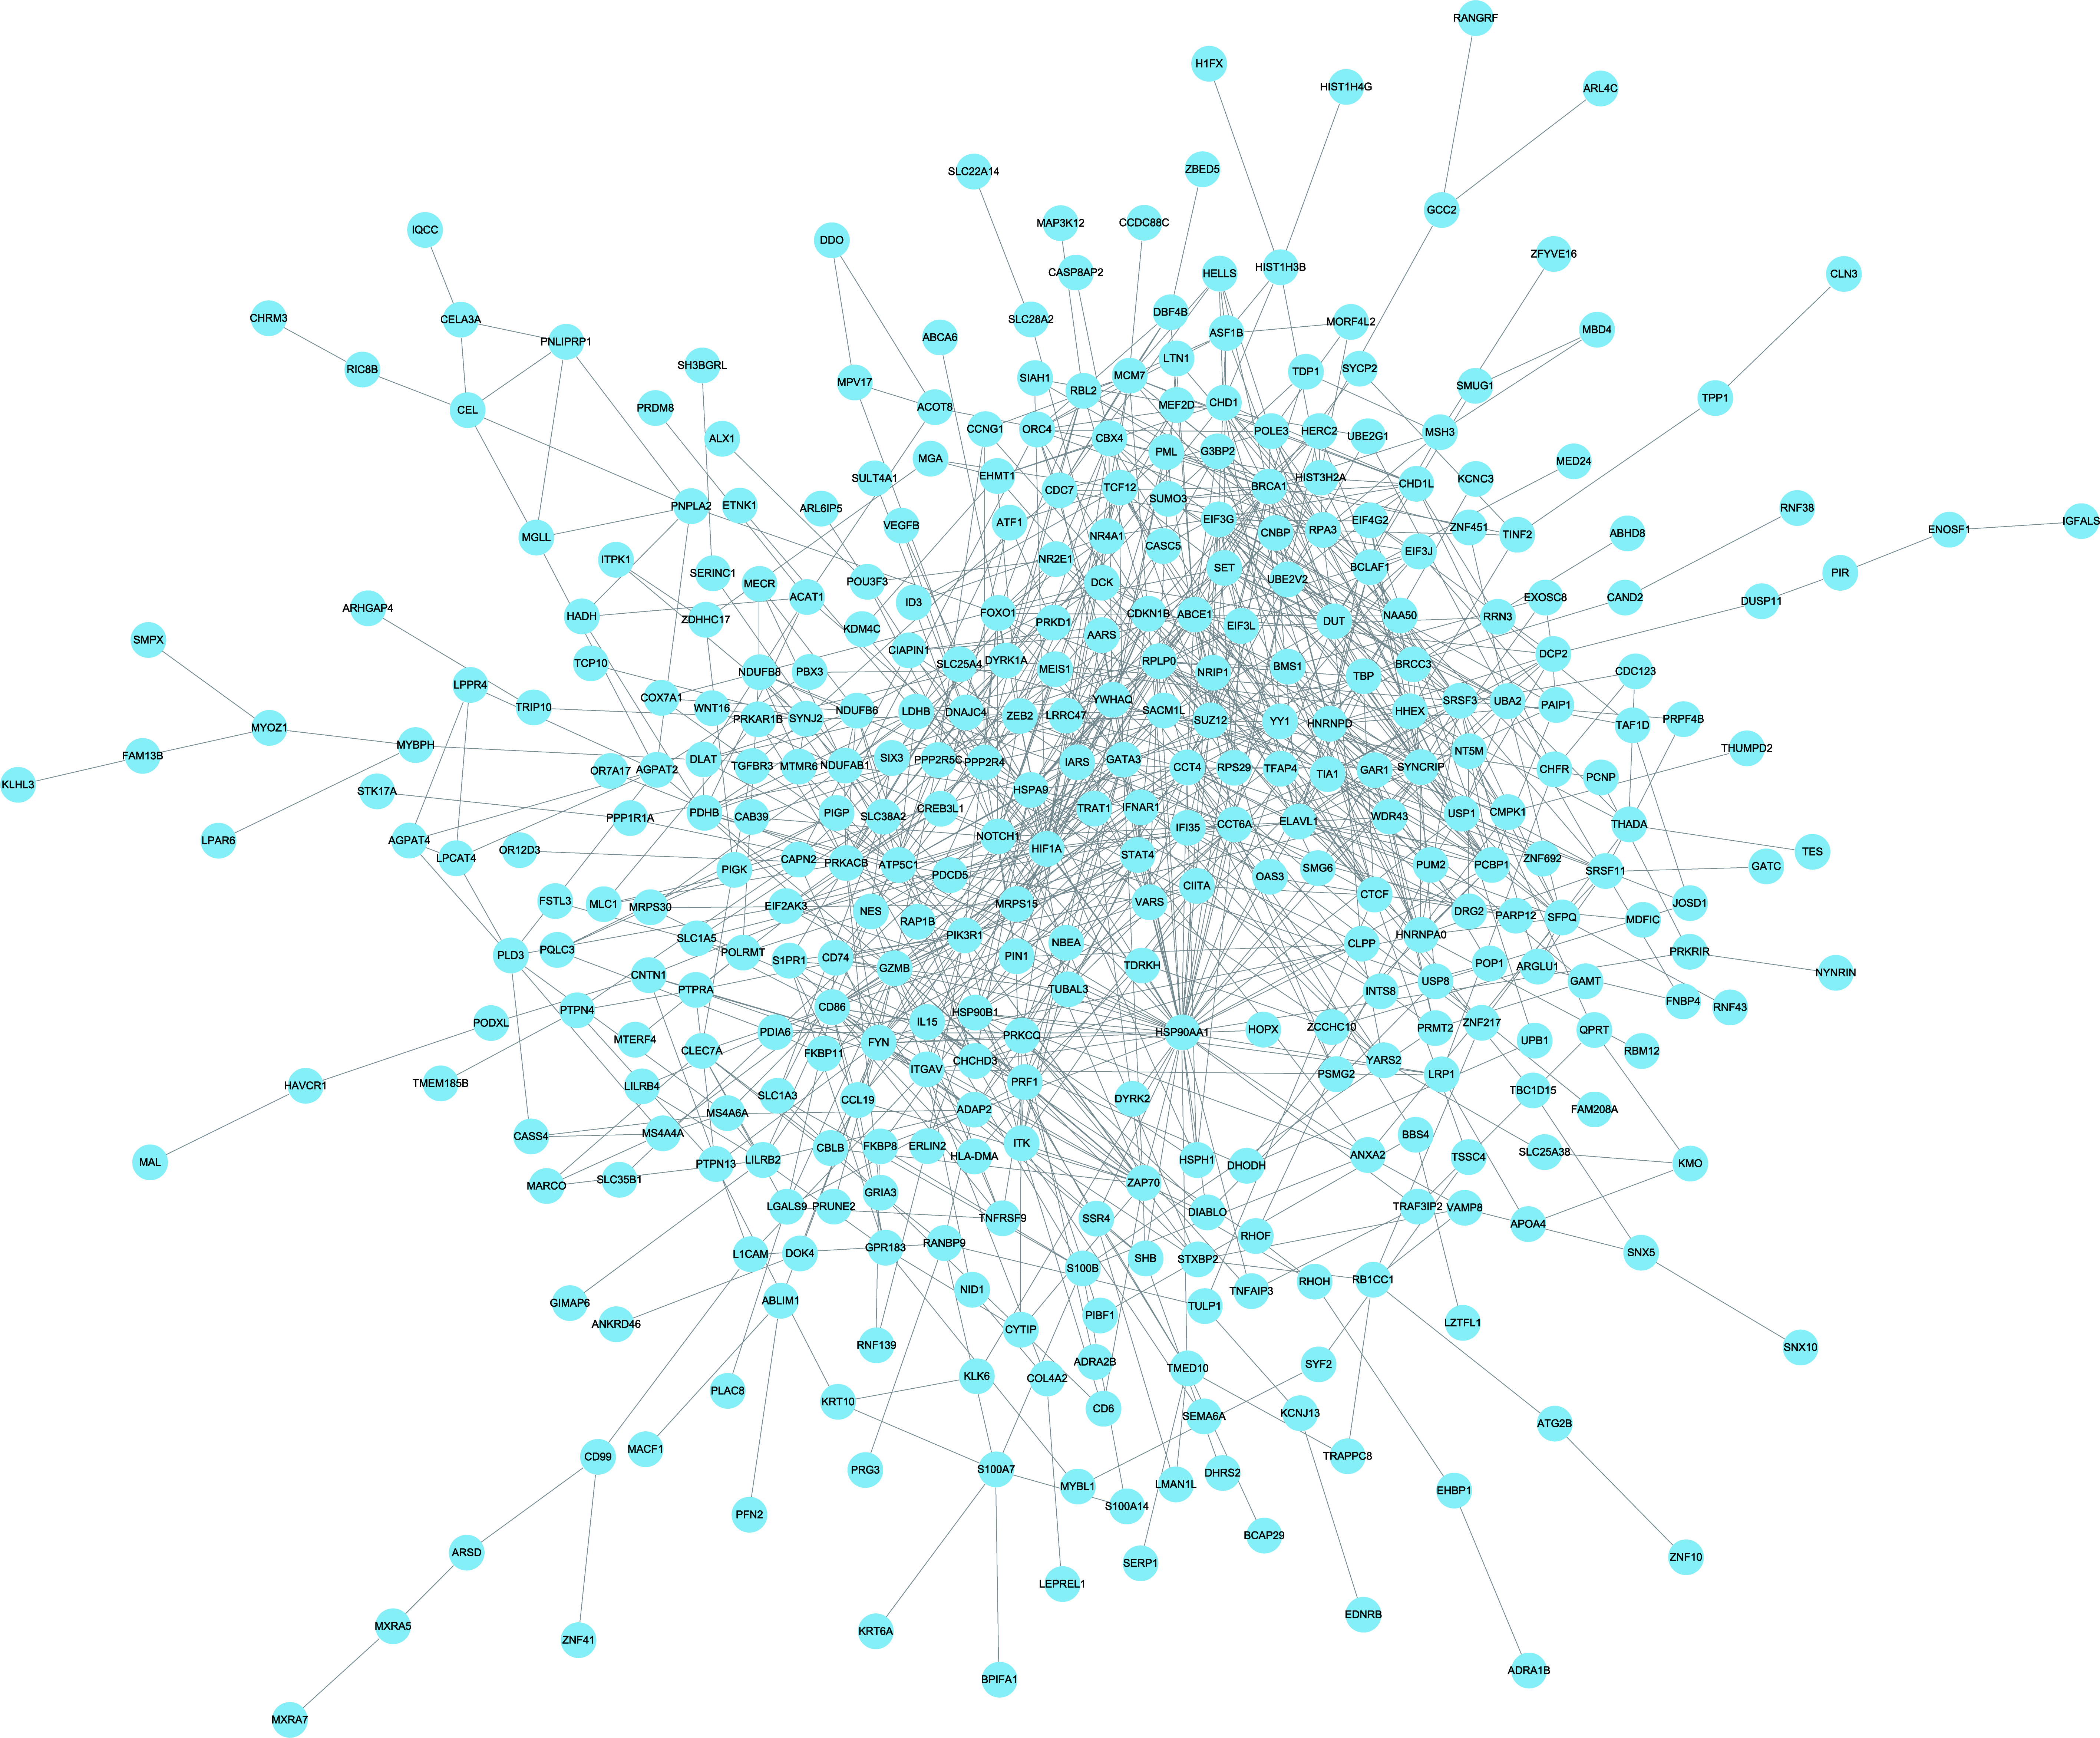
**

**Figure S3** Construction of protein-protein interaction network with modular genes.

**Figure S4** Correlation analysis between five characteristic genes and all genes. The GSE12288 dataset was used for correlation analysis of the five genes with all genes, and the positively correlated top50 genes are displayed using heat maps.


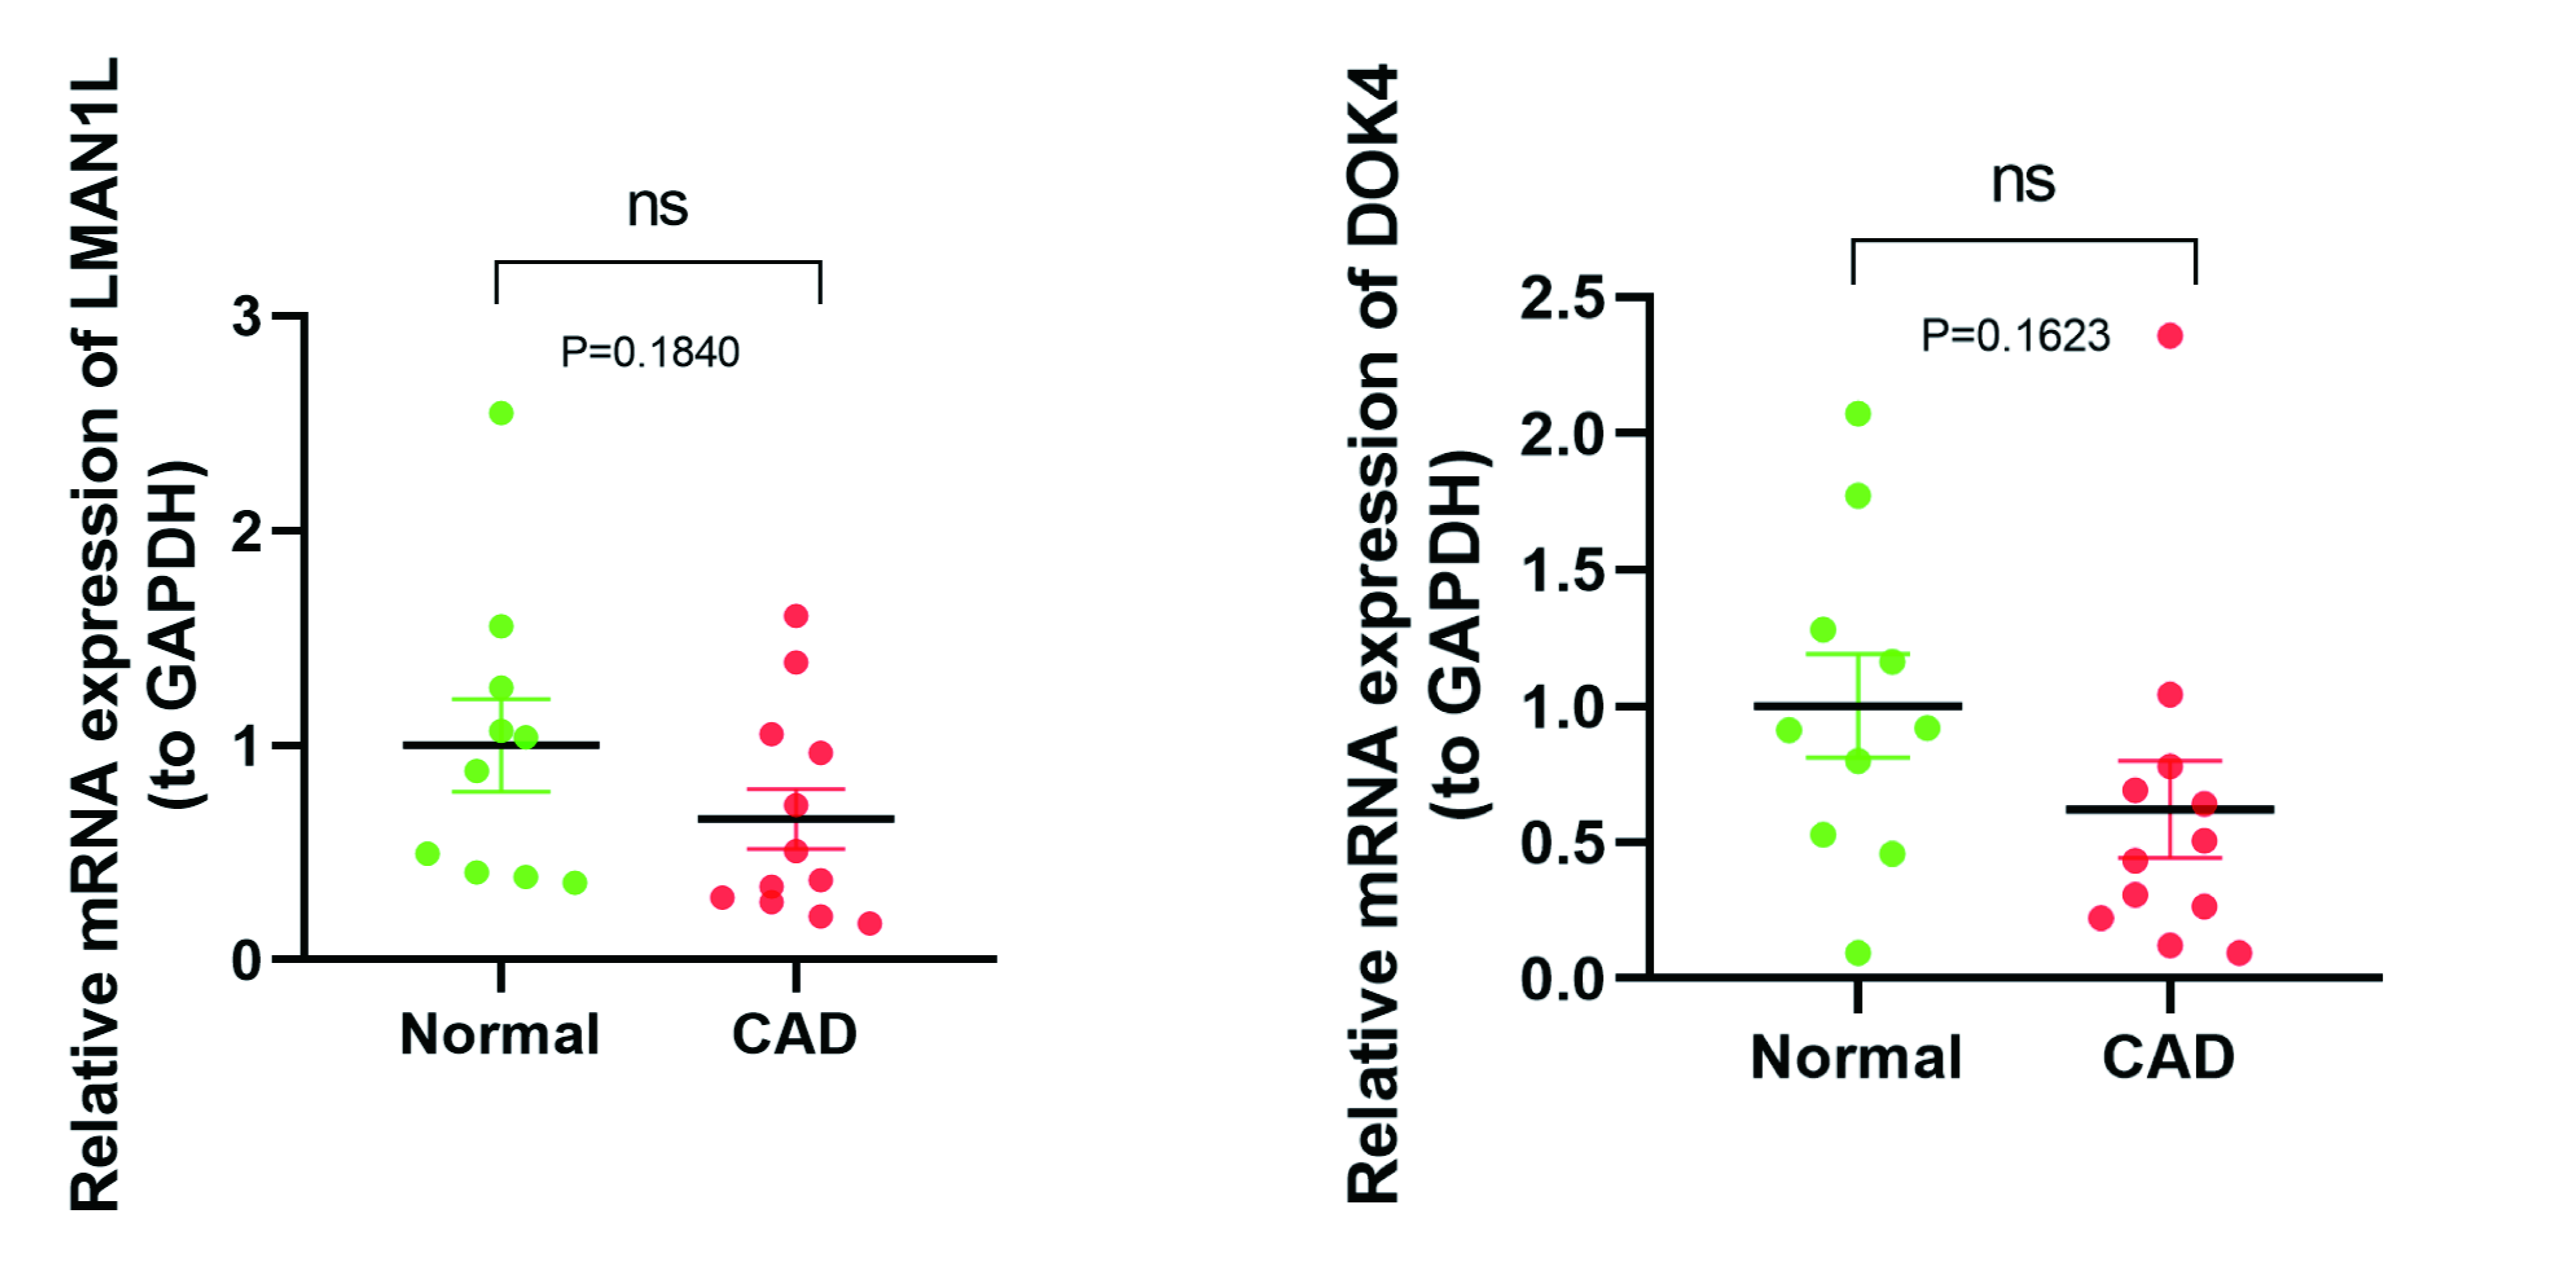


**Figure S5** qPCR analyses of the expression levels of three characteristic genes. Expression levels of *LMAN1L* and *DOK4* in healthy controls and CAD patients.
